# Supplementary material for: Isolation and Characterization of the Brassinosteroid Receptor Gene (GmBRI1) from Glycine max
Source: PubMed Central journal article supplement (PMC3975373; doi:10.3390/ijms15033871), 2014-03-04
Supplement: ijms-15-03871-s001.pdf [file ijms-15-03871-s001.pdf]

## Supplementary Information

**Table S1.** Primer sequences used.

| <b>Role</b>     | <b>Primer name</b> | <b>5' to 3' sequence</b>  |
|-----------------|--------------------|---------------------------|
| gene cloning    | GmBRI1-S           | CTTAACCTTTCACCTTCCATATCTG |
| gene cloning    | GmBRI1-A           | TGTCTGTTTCCCAAAGAATCCAC   |
| qRT-PCR         | qGmBRI1-S          | TCTCCGTCTGTTCTGCATCTTCTT  |
| qRT-PCR         | qGmBRI1-A          | GAGGTCTATGGAAGTGAGGTGCTG  |
| qRT-PCR         | GmG6PDH-S          | GTCTGTTATCCGCCTACAGCCT    |
| qRT-PCR         | GmG6PDH-A          | ACTCCTTGATACCGTTGTCCAT    |
| qRT-PCR         | GmELF1B-S          | GTTGAAAAGCCAGGGGACA       |
| qRT-PCR         | GmELF1B-A          | TCTTACCCCTTGAGCGTGG       |
| qRT-PCR         | AtDWF4-S           | TTCTCGTTATGACCAACCTAATCTC |
| qRT-PCR         | AtDWF4-A           | AGGATGACGCTCCGTTGTT       |
| qRT-PCR         | AtCPD-S            | CCTTGGAGATGGCAGCAA        |
| qRT-PCR         | AtCPD-A            | GTAACCGGGACATAGCCTTG      |
| qRT-PCR, RT-PCR | AtACTIN2-S         | ACTCTCCCGCTATGTATGTCGC    |
| qRT-PCR, RT-PCR | AtACTIN2-A         | AGAAACCCTCGTAGATTGGCAC    |

© 2014 by the authors; licensee MDPI, Basel, Switzerland. This article is an open access article distributed under the terms and conditions of the Creative Commons Attribution license (<http://creativecommons.org/licenses/by/3.0/>).
